# Supplementary material
Source: ML conference proceedings conference paper supplement (https://proceedings.neurips.cc/paper_files/paper/2021/hash/500ee9106e0e4d8f769fadfdf9f2837e-Abstract.html)
Supplement: Supplementary file 1 [file 500ee9106e0e4d8f769fadfdf9f2837e-Supplemental.zip]

Archive with 7 entries (6 files):
- supplemental/
- supplemental/CBAI_NeurIPS2021_supplemental.pdf
- supplemental/Fig1.m
- supplemental/Fig2.m
- supplemental/Fig3a.m
- supplemental/Fig3b.m
- supplemental/readme.txt
