# Supplementary material
Source: ML conference proceedings conference paper supplement (https://proceedings.neurips.cc/paper_files/paper/2021/hash/500ee9106e0e4d8f769fadfdf9f2837e-Abstract.html)
Supplement: Supplementary file 1 [file 500ee9106e0e4d8f769fadfdf9f2837e-Supplemental.zip › supplemental/Fig1.m]

mu = [2.5, 2.3, 2, 0.6];
K = 4;
max_iter = 100000;
delta = [0.25*10^-1, 0.17*10^-1, 10^-2, 0.5*10^-2, 10^-3];
e = 1*10^-1;
avg = 200;

T_avg_gap = zeros(1,length(delta));    
N_avg_gap = zeros(length(delta),K);
success_gap = zeros(1,length(delta));

T_avg_gapSM = zeros(1,length(delta));    
N_avg_gapSM = zeros(length(delta),K);
success_gapSM = zeros(1,length(delta));

T_avg_SE = zeros(1,length(delta));
N_avg_SE = zeros(length(delta),K);
success_SE = zeros(1,length(delta));

T_avg_SESM = zeros(1,length(delta));
N_avg_SESM = zeros(length(delta),K);
success_SESM = zeros(1,length(delta));

T_avg_U = zeros(1,length(delta));
par = 0.5;
N_avg_U = zeros(length(delta),K);
success_U = zeros(1,length(delta));

T_avg_med = zeros(1,length(delta));
N_avg_med = zeros(length(delta),K);
success_med = zeros(1,length(delta));

for delta_iter = 1:length(delta)
%% gap-based     
% for iter  = 1:avg
%     iter
%     t = 1;
%     mu_hat = zeros(1,K);
%     Na = zeros(1,K);
%     data = zeros(K,max_iter);
%     conf = sqrt((2)*log(K*t/(delta(delta_iter))))*ones(1,K);
%     eps = inf;
%     while eps>0 
%             x = randn(1,K) + mu;
%             % pick g1
%             g1 = rand();
%             % pick other adversaries
%             g2 = rand(1,K-1)+g1-0.3;
%             g = [g1,g2];
%             x = (1-e)*x + e*g;
%             if min(Na) <= max(sqrt(t),(1/e^2)*log(1/delta(delta_iter)))
%                 [~,arm] = min(Na);
%                 data(arm,Na(arm)+1) = x(arm);
%                 Na(arm) = Na(arm) + 1;
%                 temp = sort(data(arm,1:Na(arm)));
%                 remove = floor(Na(arm)*e);
%                 temp2 = temp(remove+1:Na(arm)-remove);
%                 mu_hat(arm) = mean(temp2);
%                 t = t + 1;
%             else
%                 % arm selection
%                 [mu_best,best_arm] = max(mu_hat);
%                 overlap = (mu_hat+conf)-(mu_best-conf(best_arm))*ones(1,K);
%                 overlap(best_arm) = -inf;
%                 [gap_amb,amb_arm] = max(overlap);
%                 eps = gap_amb;
%                 if conf(best_arm) >= conf(amb_arm)
%                     arm = best_arm;
%                 else
%                     arm = amb_arm;
%                 end
%                 data(arm,Na(arm)+1) = x(arm);
%                 Na(arm) = Na(arm) + 1;
%                 temp = sort(data(arm,1:Na(arm)));
%                 remove = floor(Na(arm)*e);
%                 temp2 = temp(remove+1:Na(arm)-remove);
%                 mu_hat(arm) = mean(temp2);
%                 t = t+1;
%                 conf(arm) = sqrt((2/Na(arm))*log(log(t)/(delta(delta_iter))));
%             end
%     end
%     [~,p_arm] = max(mu_hat);
%     success_gap(delta_iter) = success_gap(delta_iter) + (p_arm==1);
%     T_avg_gap(delta_iter) = T_avg_gap(delta_iter) + t;
%     N_avg_gap(delta_iter,:) = N_avg_gap(delta_iter,:) + Na;
% end
% T_avg_gap(delta_iter) = T_avg_gap(delta_iter)/avg;
% N_avg_gap = N_avg_gap/avg;
% alloc_gap = N_avg_gap/sum(N_avg_gap);
% success_gap(delta_iter) = vpa(success_gap(delta_iter)/avg);

%% gap-based with sample-mean
% for iter  = 1:avg
%     iter
%     t = 1;
%     mu_hat = zeros(1,K);
%     Na = zeros(1,K);
%     data = zeros(K,max_iter);
%     conf = sqrt((2)*log(K*t/(delta(delta_iter))))*ones(1,K);
%     eps = inf;
%     while eps>0 
%             x = randn(1,K) + mu;
%             % pick g1
%             g1 = rand();
%             % pick other adversaries
%             g2 = rand(1,K-1)+g1-0.3;
%             g = [g1,g2];
%             x = (1-e)*x + e*g;
%             if min(Na) <= max(sqrt(t),(1/e^2)*log(1/delta(delta_iter)))
%                 [~,arm] = min(Na);
%                 data(arm,Na(arm)+1) = x(arm);
%                 Na(arm) = Na(arm) + 1;
%                 temp = sort(data(arm,1:Na(arm)));
%                 remove = floor(Na(arm)*e);
%                 temp2 = temp(remove+1:Na(arm)-remove);
%                 mu_hat(arm) = mean(temp2);
%                 t = t + 1;
%             else
%                 % arm selection
%                 [mu_best,best_arm] = max(mu_hat);
%                 overlap = (mu_hat+conf)-(mu_best-conf(best_arm))*ones(1,K);
%                 overlap(best_arm) = -inf;
%                 [gap_amb,amb_arm] = max(overlap);
%                 eps = gap_amb;
%                 if conf(best_arm) >= conf(amb_arm)
%                     arm = best_arm;
%                 else
%                     arm = amb_arm;
%                 end
%                 data(arm,Na(arm)+1) = x(arm);
%                 Na(arm) = Na(arm) + 1;
% %                 temp = sort(data(arm,1:Na(arm)));
% %                 remove = floor(Na(arm)*e);
% %                 temp2 = temp(remove+1:Na(arm)-remove);
% %                 mu_hat(arm) = mean(temp2);
%                 mu_hat(arm) = mean(data(arm,1:Na(arm)));
%                 t = t+1;
%                 conf(arm) = sqrt((2/Na(arm))*log(log(t)/(delta(delta_iter))));
%             end
%     end
%     [~,p_arm] = max(mu_hat);
%     success_gapSM(delta_iter) = success_gapSM(delta_iter) + (p_arm==1);
%     T_avg_gapSM(delta_iter) = T_avg_gapSM(delta_iter) + t;
%     N_avg_gapSM(delta_iter,:) = N_avg_gapSM(delta_iter,:) + Na;
% end
% T_avg_gapSM(delta_iter) = T_avg_gapSM(delta_iter)/avg;
% N_avg_gapSM = N_avg_gapSM/avg;
% alloc_gapSM = N_avg_gapSM/sum(N_avg_gapSM);
% success_gapSM(delta_iter) = vpa(success_gapSM(delta_iter)/avg);
% 

%% SE-trimmed mean


for iter  = 1:avg
    iter
    t = 1;
    S = [1,2,3,4];
    mu_hat = zeros(1,K);
    Na = zeros(1,K);
    alpha = sqrt(2*log(K*pi^2/(6*delta(delta_iter))));
    data = zeros(K,max_iter);
    while length(S)>1
        for i=1:length(S)
            x = randn()+ mu(S(i));
            % pick g1
            g1 = rand();
            % pick other adversaries
            g2 = rand(1,K-1)+g1-0.3;
            g = [g1,g2];
            x = (1-e)*x + e*g(S(i));
            if t == 1
                mu_hat(S(i)) = x;
                data(S(i),Na(S(i))+1) = x;
                Na(S(i)) = Na(S(i)) + 1;
                t = t+1;
            else
                data(S(i),Na(S(i))+1) = x;
                Na(S(i)) = Na(S(i)) + 1;
                temp = sort(data(S(i),1:Na(S(i))));
                remove = floor(Na(S(i))*e);
                temp2 = temp(remove+1:Na(S(i))-remove);
                mu_hat(S(i)) = mean(temp2);
                t = t+1;
            end
        end
        elem = [];
        for i=1:length(S)
            if mu_hat(i) <= max(mu_hat) - 2*alpha && Na(S(i))>=(1/e^2)*log(1/delta(delta_iter))
                elem = [S(i), elem];
            end
        end
        S = setdiff(S,elem);
        alpha = sqrt((2/t)*log(K*t^2*pi^2/(6*delta(delta_iter))));
    end
    success_SE(delta_iter) = success_SE(delta_iter) + (S(1)==1);
    T_avg_SE(delta_iter) = T_avg_SE(delta_iter) + t;
    N_avg_SE(delta_iter,:) = N_avg_SE(delta_iter,:) + Na;
end
success_SE(delta_iter) = success_SE(delta_iter)/avg;
T_avg_SE(delta_iter) = T_avg_SE(delta_iter)/avg;
N_avg_SE = N_avg_SE/avg;
alloc_SE = N_avg_SE/sum(N_avg_SE);

%% SE-sample mean

% for iter  = 1:avg
%     iter
%     t = 1;
%     S = [1,2,3,4];
%     mu_hat = zeros(1,K);
%     Na = zeros(1,K);
%     alpha = sqrt(2*log(K*pi^2/(6*delta(delta_iter))));
%     data = zeros(K,max_iter);
%     while length(S)>1
%         for i=1:length(S)
%             x = randn()+ mu(S(i));
%             % pick g1
%             g1 = rand();
%             % pick other adversaries
%             g2 = rand(1,K-1)+g1-0.3;
%             g = [g1,g2];
%             x = (1-e)*x + e*g(S(i));
%             if t == 1
%                 mu_hat(S(i)) = x;
%                 data(S(i),Na(S(i))+1) = x;
%                 Na(S(i)) = Na(S(i)) + 1;
%                 t = t+1;
%             else
%                 data(S(i),Na(S(i))+1) = x;
%                 Na(S(i)) = Na(S(i)) + 1;
% %                 temp = sort(data(S(i),1:Na(S(i))));
% %                 remove = floor(Na(S(i))*e);
% %                 temp2 = temp(remove+1:Na(S(i))-remove);
% %                 mu_hat(S(i)) = mean(temp2);
%                 mu_hat(S(i)) = mean(data(S(i),1:Na(S(i))));
%                 t = t+1;
%             end
%         end
%         elem = [];
%         for i=1:length(S)
%             if mu_hat(i) <= max(mu_hat) - 2*alpha && Na(S(i))>=(1/e^2)*log(1/delta(delta_iter))
%                 elem = [S(i), elem];
%             end
%         end
%         S = setdiff(S,elem);
%         alpha = sqrt((2/t)*log(K*t^2*pi^2/(6*delta(delta_iter))));
%     end
%     success_SESM(delta_iter) = success_SESM(delta_iter) + (S(1)==1);
%     T_avg_SESM(delta_iter) = T_avg_SESM(delta_iter) + t;
%     N_avg_SESM(delta_iter,:) = N_avg_SESM(delta_iter,:) + Na;
% end
% success_SESM(delta_iter) = success_SESM(delta_iter)/avg;
% T_avg_SESM(delta_iter) = T_avg_SESM(delta_iter)/avg;
% N_avg_SESM = N_avg_SESM/avg;
% alloc_SESM = N_avg_SESM/sum(N_avg_SESM);

%% Gap-based uniform sampling


% %p = 0.01;
% for iter  = 1:avg
%     iter
%     t = 1;
%     mu_hat = zeros(1,K);
%     Na = zeros(1,K);
%     data = zeros(K,max_iter);
%     conf = sqrt((2)*log(K*t/(delta(delta_iter))))*ones(1,K);
%     eps = inf;
%     while eps>0 
%             x = randn(ones(1,K)) + mu - 1;
%             % pick g1
%             g1 = rand();
%             % pick other adversaries
%             g2 = rand(1,K-1)+g1-0.3;
%             g = [g1,g2];
%             x = (1-e)*x + e*g;
%             if t==0
%                 [~,arm] = min(Na);
%                 data(arm,Na(arm)+1) = x(arm);
%                 Na(arm) = Na(arm) + 1;
%                 temp = sort(data(arm,1:Na(arm)));
%                 remove = floor(Na(arm)*e);
%                 temp2 = temp(remove+1:Na(arm)-remove);
%                 mu_hat(arm) = mean(temp2);%(Na(arm)*mu_hat(arm) + x(arm))/(Na(arm)+1);
%                 t = t + 1;
%             else
%                 % arm selection
%                 [mu_best,best_arm] = max(mu_hat);
%                 overlap = (mu_hat+conf)-(mu_best-conf(best_arm))*ones(1,K);
%                 overlap(best_arm) = -inf;
%                 [gap_amb,amb_arm] = max(overlap);
%                 eps = gap_amb;
%                 arm = randi(K);
%                 data(arm,Na(arm)+1) = x(arm);
%                 Na(arm) = Na(arm) + 1;
%                 temp = sort(data(arm,1:Na(arm)));
%                 remove = floor(Na(arm)*e);
%                 temp2 = temp(remove+1:Na(arm)-remove);
%                 mu_hat(arm) = mean(temp2);
%                 t = t+1;
%                 conf(arm) = sqrt((2/Na(arm))*log(log(t)/(delta(delta_iter))));
%             end
%     end
%     [~,p_arm] = max(mu_hat);
%     success_U(delta_iter) = success_U(delta_iter) + (p_arm==1);
%     T_avg_U(delta_iter) = T_avg_U(delta_iter) + t;
%     N_avg_U(delta_iter,:) = N_avg_U(delta_iter,:) + Na;
% end
% T_avg_U(delta_iter) = T_avg_U(delta_iter)/avg;
% N_avg_U = N_avg_U/avg;
% alloc_U = N_avg_U/sum(N_avg_U);
% success_U(delta_iter) = vpa(success_U(delta_iter)/avg);

%% median-based (CBAI)

for iter  = 1:avg
    iter
    t = 1;
    S = [1,2,3,4];
    mu_hat = zeros(1,K);
    Na = zeros(1,K);
    alpha = sqrt(2*log(K*pi^2/(6*delta(delta_iter))));
    data = zeros(K,max_iter);
    while length(S)>1
        for i=1:length(S)
            x = randn()+ mu(S(i));
            % pick g1
            g1 = rand();
            % pick other adversaries
            g2 = rand(1,K-1)+g1-0.3;
            g = [g1,g2];
            x = (1-e)*x + e*g(S(i));
            if t == 1
                mu_hat(S(i)) = x;
                data(S(i),Na(S(i))+1) = x;
                Na(S(i)) = Na(S(i)) + 1;
                t = t+1;
            else
                data(S(i),Na(S(i))+1) = x;
                Na(S(i)) = Na(S(i)) + 1;
                mu_hat(S(i)) = median(data(S(i),1:Na(S(i))));
                t = t+1;
            end
        end
        elem = [];
        for i=1:length(S)
            if mu_hat(i) <= max(mu_hat) - 2*alpha 
                elem = [S(i), elem];
            end
        end
        S = setdiff(S,elem);
        alpha = sqrt((2/t)*log(K*t^2*pi^2/(6*delta(delta_iter))));
    end
    success_med(delta_iter) = success_med(delta_iter) + (S(1)==1);
    T_avg_med(delta_iter) = T_avg_med(delta_iter) + t;
    N_avg_med(delta_iter,:) = N_avg_med(delta_iter,:) + Na;
end
success_med(delta_iter) = success_med(delta_iter)/avg;
T_avg_med(delta_iter) = T_avg_med(delta_iter)/avg;
N_avg_med = N_avg_med/avg;
alloc_med = N_avg_med/sum(N_avg_med);
end

%% plots

figure()
plot(delta,T_avg_SE,'k*-')
hold on
% plot(delta,T_avg_SESM,'k--')
% hold on
% plot(delta,T_avg_gap,'ro-')
% hold on
% plot(delta,T_avg_gapSM,'r--')
% hold on
plot(delta,T_avg_med,'gv-')
grid on
% plot(delta,T_avg_U,'b.-')
legend('Algorithm 2','Algorithm 2: attack-free','Algorithm 1','Algorithm 1: attack-free','Median-based','random')
