# Supplementary material
Source: ML conference proceedings conference paper supplement (https://proceedings.neurips.cc/paper_files/paper/2021/hash/500ee9106e0e4d8f769fadfdf9f2837e-Abstract.html)
Supplement: Supplementary file 1 [file 500ee9106e0e4d8f769fadfdf9f2837e-Supplemental.zip › supplemental/readme.txt]

The folder includes the MATLAB codes for generating Figure 1, Figure 2, Figure 3a and Figure 3b in the paper. 
For the experiments with real data, we have provided the link of the datasets in Appendix G. Note that the 
mean vector corresponding to the real data has been processed from the corresponding *dataset.csv* files by 
removing the "captions" column from the NYCC dataset, and only keeping the ACVRL1 column for the PKIS2 dataset. 
 
